# Supplementary material
Source: PubMed Central journal article supplement (PMC5625890)
Supplement: pnas.1618481114.sapp.pdf [file pnas.1618481114.sapp.pdf]

## Supporting Information (SI)

### SI Text:

#### 1. The carbon-cycle model and the energy-balance model.

The model is an integrated carbon-cycle and one-box energy balance model. The carbon-cycle component adopts the Bern geochemistry model<sup>1</sup> to estimate atmospheric CO<sub>2</sub> and methane concentration from emissions. The radiative forcing due to GHGs is calculated from their atmospheric concentration, while the radiative forcing due to aerosols is scaled with emissions. The radiative forcing is then inputted into the energy balance model (similar to the formulation of ref. <sup>2</sup>) to calculate global mean temperature change. The model simulation compares well against observations of historical CO<sub>2</sub> concentrations (Fig. S1), temperature changes (Fig. 2), ocean heat content, and sea-level rise. The key parameters in the energy balance model are a 300-m ocean mixed layer and climate sensitivity of 0.8 (0.5 to 1.2 at the 10% to 90% confidence interval) °C/(W/m<sup>2</sup>), or 3°C due to a doubling of CO<sub>2</sub>. And the probability density function of climate sensitivity is following the formulation in ref. <sup>3</sup>, which is skewed more towards the high value of climate sensitivity (“fat tail”, see more discussion in Section 4 (d) and Section 5 below). The probability density function of temperature projection is calculated by using 1500 randomizations at different values of climate sensitivity while keeping the forcing the same.

#### 2. The scenarios.

Long-lived GHGs. In the Baseline-default scenario for CO<sub>2</sub>, the emission keeps increasing throughout the 21<sup>st</sup> century (RCP8.5). The 5% to 95% range of baseline-default is also adopted (Fig. S1b). In the baseline-fast scenario for CO<sub>2</sub> (pre-INDCs), emissions effectively increase at a rate of 1.1%/year before 2030 and then following Representative Concentration Pathway 6.0 (Fig. S1a). In the mitigation scenario for CO<sub>2</sub> (i.e. INDCs and post-2030 decarbonization), emissions effectively increase at a rate of 0.8%/year before 2030 (following INDCs) and then decrease at a rate of 5.5%/year after 2030 (CN2030 in Fig. S2a). The CN2020 scenario is the same as CN2030, except that the peak of emission is reached at 2020 (Fig. S2b).

The other long-lived GHG with non-negligible forcing is nitrous oxide (N<sub>2</sub>O). Its current forcing is approximately 0.15 W/m<sup>2</sup> and is projected to increase to 0.23 W/m<sup>2</sup> by 2100 (Fig. S6).

32 Net contribution to warming from 2010 to 2100 is only about 0.1°C (50% probability). Given the  
33 small size of warming from present to 2100, and the fact that N<sub>2</sub>O emission is tied to agriculture  
34 and thus has the greatest challenge in limiting N<sub>2</sub>O emissions with a 10 billion population by 2100,  
35 we are not targeting N<sub>2</sub>O in the following mitigation measures discussed here.

36 SLCPs. Under the baseline scenario, CH<sub>4</sub> emissions are projected to rise by 40% by 2030  
37 from the 2005 level, and BC emissions are projected to increase by 15% by 2020 and then level  
38 off. The mitigation scenarios follow recommendations by the International Institute for Applied  
39 Systems Analysis (IIASA)<sup>4</sup> and the Royal Society<sup>5</sup> that maximum feasible reductions of air  
40 pollution regulations can result in reductions of 50% for CO emissions and 30% of CH<sub>4</sub> emissions  
41 from the 2005 levels by 2030, as well as reductions of 50% for BC emissions by 2050. The  
42 emissions of sulfates and their precursors are projected to decrease by 80% throughout the century.  
43 These aerosol scenarios are within the wide range suggested by a recent integrated-assessment  
44 model study<sup>6</sup>, which included both “frozen legislation” (similar to our Baseline-fast) and “stringer  
45 legislation” (similar to our mitigation) scenarios. The total halocarbon forcing is slightly modified  
46 to include the Kigali Amendment to the Montreal Protocol that calls for a faster phase-out of HFC  
47 use<sup>7</sup>. The 2050 HFC forcing is projected to be about 10% of the 2020 value. Even under the  
48 stringent mitigation scenario, a residual radiative forcing of HFC that is higher than the 2000 level  
49 (about 0.05 W/m<sup>2</sup>) is included<sup>8</sup>.

50 The time series of total radiative forcing applied to the energy balance model are given in  
51 Fig. S4 and the radiative forcing due to individual compositions are given in Fig. S6. We note that  
52 CH<sub>4</sub> effects include forcing through the formation of tropospheric O<sub>3</sub> and stratospheric water  
53 vapor. BC effects also factored in co-emitted organic carbon, which partially offset the warming  
54 effects. Thus, the industrial era climate forcing (present-day minus 1850) of BC forcing in this  
55 paper is 0.7 W/m<sup>2</sup>, a conservative value compared to the 1.1 W/m<sup>2</sup> in a recent assessment<sup>9</sup>.

56 SLCP mitigation requires a multi-dimensional and multi-sectoral approach<sup>10</sup>. (a) In the  
57 case of HFCs, mitigation requires coordination with the Montreal Protocol since HFCs are  
58 proposed to be covered by an amendment to this treaty<sup>11</sup>. (b) BC is a major air pollutant. In urban  
59 areas, BC emissions from diesel vehicles are a primary source of particulate matter. Emissions of  
60 BC and organic aerosols by biomass cook stoves are the principal air pollutants in rural areas and  
61 are responsible for nearly three million deaths worldwide<sup>12</sup>. (c) CH<sub>4</sub> is a GHG itself but also leads  
62 to the production of tropospheric ozone, which is a GHG as well as a major air pollutant with

63 negative impacts on public health and crop yields. BC and methane mitigation require coordination  
64 with urban and national air pollution agencies. A good example is the recent California Air  
65 Resource Board initiative on SLCPs<sup>13</sup>. The combustion of coal and petroleum release sulfur  
66 dioxide (SO<sub>2</sub>), which is converted to sulfate particles. These sulfates reflect sunlight, which results  
67 in cooling. The cooling effect of co-emitted sulfate and nitrate particles has masked as much as  
68 30-50% of the warming effect of CO<sub>2</sub> released by fossil fuels. SO<sub>2</sub> and NO<sub>x</sub> emissions are  
69 eliminated when energy sources are switched from fossil fuels to renewables and the warming  
70 produced by the unmasking of sulfate/nitrate effects during the coming decades partially offsets  
71 the cooling effect of CO<sub>2</sub> mitigation<sup>14, 15</sup>. The co-benefit of taking explicit measures of mitigating  
72 SLCP emissions is immense. Nearly seven million people die every year due to ambient air  
73 pollution, to which sulfates and nitrates contribute as much 40%. Likewise, some of the warming  
74 effects of black carbon emissions are offset by the cooling effect of organics aerosols; however,  
75 reducing organic aerosols along with black carbon resulting from biomass cooking and other  
76 sources can save millions of lives every year.

77 The use of carbon extraction and sequestration (CES) is a promising avenue being pursued  
78 by many groups<sup>16</sup> with applications for power, heat, and transportation fuels. Biomass, depending  
79 on the source and harvesting practices, is a carbon neutral energy source for production of  
80 bioenergy<sup>17</sup>. Capture of CO<sub>2</sub> can be accomplished in bioenergy power plants, biochar production  
81 by pyrolysis and storage in soils, and restoration of soil organic pools. Our analysis suggests that  
82 urgent investments in these avenues are needed so that scalable technology will be available by  
83 2030. Such a window is closing quickly<sup>18</sup>.

84

### 85 **3. Validation of the climate sensitivity: equilibrium and transient values.**

86 The central value (50% probability) of the equilibrium climate sensitivity of the model is  
87 3.0°C for a doubling of carbon dioxide. The climate models used in the IPCC studies have been  
88 calibrated by comparing two metrics. First is the equilibrium climate warming due to a doubling  
89 of carbon dioxide concentration and this warming is referred as equilibrium climate sensitivity  
90 (ECS). The second important metric is the transient climate response (TCR). This is estimated by  
91 increasing the CO<sub>2</sub> concentration by 1% each year until it doubles at year 70. The simulated  
92 warming for the year when CO<sub>2</sub> doubles is the TCR. The most recent IPCC report compared ECS  
93 and TCR for 30 models from around the world<sup>19</sup>. The 30-model mean for ECS is 3.2°C (2.1°C to

94 4.7°C for the minimum to maximum range), compared well with the 3.0°C for the model used in  
95 this study. The ECS comparison suggests that the treatment of the net effects of climate physical-  
96 dynamical feedback processes in the model used in this study is consistent with the more  
97 comprehensive three-dimensional climate models used in IPCC assessment report. With respect  
98 to TCR, which is a crucial test for the treatment of ocean thermal inertia, the 30-model mean is  
99 1.8°C (minimum to maximum range of 1.1°C to 2.6°C), which again compares favorably with the  
100 TCR of 1.8°C for the present model. The ECS and TCR are hotly debated issues and many studies  
101 have attempted to infer it from observed temperature and forcing trends for the 20<sup>th</sup> century. Few  
102 of these studies<sup>20, 21</sup> obtained ECS or TCR values that are about 50% smaller than the IPCC multi-  
103 model mean. A more recent study that corrects for sampling errors in observational trends,  
104 obtained a TCR of 1.7°C<sup>22</sup>, again consistent with the 1.8°C value used in this study.

105

#### 106 **4. Uncertainties treatment in the modeled warming.**

107 We have included the following sources of uncertainties into consideration:

108 (a) Emission scenarios These arise in projecting population growth, carbon intensity of  
109 energy, carbon intensity of the economy, the growth of GDP and consumption patterns among  
110 others. And we have adopted both Baseline-fast and Baseline-default scenarios (Fig. 1 and Fig. 2)  
111 as well as the 5%-95% associated with each scenario (Fig. S1).

112 (b) Modeling of aerosol and cloud processes (Fig. 1). Aerosol forcing is a major source of  
113 uncertainty in calculating the historical radiative forcing, and the spread in the aerosol forcing for  
114 the year 2010, can range from 0 to  $-2 \text{ Wm}^{-2}$ <sup>23</sup>. In exploring the role of this uncertainty, we account  
115 for the entanglement of the aerosol forcing uncertainty with climate sensitivity uncertainty (blue  
116 dashed line in Fig. 1). That is, if a higher climate sensitivity is used, the historical aerosol forcing  
117 needs to be more negative to simulate the observed temperature trends of the 20<sup>th</sup> century. For each  
118 climate sensitivity value selected, we adjust the historical aerosol forcing (but staying within the 0  
119 to  $-2 \text{ Wm}^{-2}$  range) to obtain the optimal fit for the 20th-century temperature trends, and then apply  
120 the same adjustment for the future aerosol forcing. Because of the mutually compensating effect  
121 of the aerosol forcing with climate sensitivity (more negative aerosol forcing requires larger  
122 climate sensitivity to explain the observed warming), the aerosol forcing uncertainty turns out to  
123 have a smaller effect than expected on the spread of the 2100 warming (Fig. 1 of ref<sup>24</sup>).

124 (c) Carbon-cycle climate feedbacks. There are three positive feedbacks identified so far:  
125 decrease in oceanic and land uptake of the emitted carbon which amplifies the increase in  
126 atmospheric CO<sub>2</sub>; thawing of permafrost which releases CO<sub>2</sub> and CH<sub>4</sub> to the atmosphere; and  
127 increased emission of CH<sub>4</sub> from the warmer wetlands. Most of the climate models do not include  
128 the CO<sub>2</sub> and CH<sub>4</sub> released by the permafrost or the wetlands. These positive feedbacks are  
129 effectively considered in Fig. 1.

130 (d) Physical-dynamical climate feedbacks. The largest source of climate sensitivity  
131 uncertainty is that due to the physical-dynamical feedbacks arising from water vapor (the largest  
132 greenhouse gas), clouds (the dominant regulator of radiative forcing), and snow/ice albedo from  
133 melting of Arctic sea ice and glaciers among other parts of the cryosphere.

134

### 135 **5. Origin of the skewed distribution of climate sensitivity.**

136 We adopted the skewed distribution of climate sensitivity derived by Roe and Baker<sup>3</sup>. This  
137 distribution was derived from the several tens of published studies with three-dimensional climate  
138 models (3), yielding a central value of 3°C warming for a doubling of CO<sub>2</sub> (definition for climate  
139 sensitivity) with a 95% range of 2°C to 4.5°C<sup>25</sup>. The distribution is asymmetric (skewed) with a  
140 well-defined lower bound but without a sharp upper bound. To examine if this is reasonable, let  
141 us consider the 1% probability value for the distribution adopted for Fig. 1, which is about 5.5°C  
142 for a doubling of CO<sub>2</sub>, compared with the central value of 3°C. Is the 5.5°C climate sensitivity  
143 reasonable or unrealistically high? A recent 3-D coupled ocean-atmosphere climate model study<sup>26</sup>  
144 showed that when the model included the mixed ice-water phase clouds, the climate sensitivity  
145 increased from 4°C to 5.3°C. Global climate models assessed by ref (3) included the ice/snow  
146 albedo feedback, but a recent study<sup>27</sup> using satellite data showed the observed ice/snow albedo  
147 decreased more steeply with warming than that depicted in models. Also, satellite data showed a  
148 large retreat of the mid-latitude storm track clouds with warming than that revealed by model  
149 studies<sup>28</sup>. Since these cloud systems have a large radiative cooling effect (because of their albedo),  
150 underestimation of their poleward retreat will underestimate their positive feedback effect. The  
151 basic inference is that the 1% probability of 5.5°C climate sensitivity in the ref 3 distribution can  
152 not be ruled out as out of bounds of likely values.

153

### 154 **6. Individual contributions to mitigation.**

155           With unchecked emissions, the warming can become as large as 5.0°C (baseline-default.  
156 Fig. 1). Just reducing the carbon intensity of the economy from the projected 50% (from 2010  
157 values) by 2100 (under baseline-default) to 80% (under baseline-fast), will cut CO<sub>2</sub> concentration  
158 sufficiently to reduce the warming by 0.9°C. Reducing CO<sub>2</sub> by achieving carbon neutrality will  
159 reduce the warming by at least another 1.6°C to 1.9°C (Table S1). However, the 0.6°C warming  
160 caused by unmasking of aerosol cooling (most of which is due to fossil fuels) would offset some  
161 of the cooling due to CO<sub>2</sub> mitigation. What fraction of this unmasking is caused by CN measures  
162 versus air pollution regulations would depend on the relative timing of CN measures and air  
163 pollution regulations. Reducing the super pollutant emissions through a combination of CO<sub>2</sub> and  
164 SLCP measures, can reduce the warming by another 1.2°C. Extracting one trillion tons of CO<sub>2</sub>  
165 from the air would cut the warming by another 0.3°C by 2100 and therefore achieve WB2C goal  
166 and also bend the warming curve to a cooling trend (Fig. 3).  
167

168 **SI Table:**

169

170 Table S1. The contribution of individual mitigation measures to the warming in the 21<sup>st</sup> century.

171

| Mitigation Measure                       | 2050 change in °C | 2100 change in °C | Estimated in     |
|------------------------------------------|-------------------|-------------------|------------------|
| Energy Intensity                         | -0.2              | -0.9              | Fig. 1, Fig. S1  |
| CO <sub>2</sub> due to CN2030            | -0.1              | -1.6              | Fig. S3          |
| CO <sub>2</sub> due to CN2020            | -0.3              | -1.9              | Fig. 3           |
| CO <sub>2</sub> due to CES1t             | 0                 | -0.3              | Fig. S3          |
| BC                                       | -0.2              | -0.3              | Fig. S3, Fig. S6 |
| CH <sub>4</sub> including O <sub>3</sub> | -0.2              | -0.45             | Fig. S3, Fig. S6 |
| HFCs                                     | -0.2              | -0.45             | Fig. S3, Fig. S6 |
| Aerosol Unmasking                        | +0.3              | +0.6              | Fig. S7          |

172

173

174 SI Figures:

175

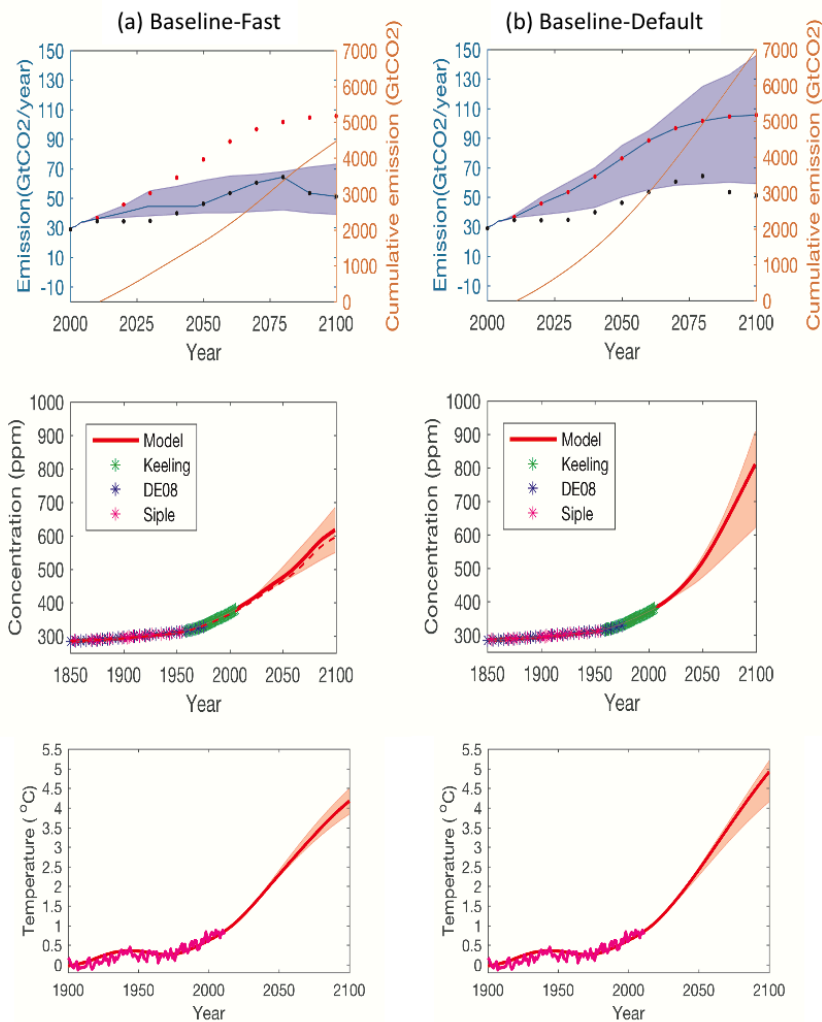

176

177

178 Fig. S1. (a) Under the Baseline-fast scenario. CO<sub>2</sub> emission rate (blue curve, Gt CO<sub>2</sub>/year), CO<sub>2</sub>  
179 cumulative emissions since 2010 (red curve, Gt CO<sub>2</sub>) are shown in the upper panel. The 5% to  
180 95% uncertainty of the emission pathway (as adopted from Figure 6.4 of ref<sup>29</sup>) is also shown in  
181 the shading. CO<sub>2</sub> emission in RCP8.5 (red dots) and RCP6.0 (black dots) are shown for  
182 comparisons. In the middle panel, simulated CO<sub>2</sub> atmospheric concentration (red curve, ppm) is  
183 shown along with the 5% to 95% uncertainty range. The red dashed line is the simulated CO<sub>2</sub>  
184 concentration when the land carbon uptake coefficient in the carbon cycle model is increased by  
185 20%. In the bottom panel, simulated temperature increase (red curve, °C) is shown along with the



186 5% to 95% uncertainty due to CO<sub>2</sub> pathway, not due to climate sensitivity. (b) Same as (a), except  
187 for the baseline-default scenario<sup>29</sup>, which is more in line with RCP8.5.

188

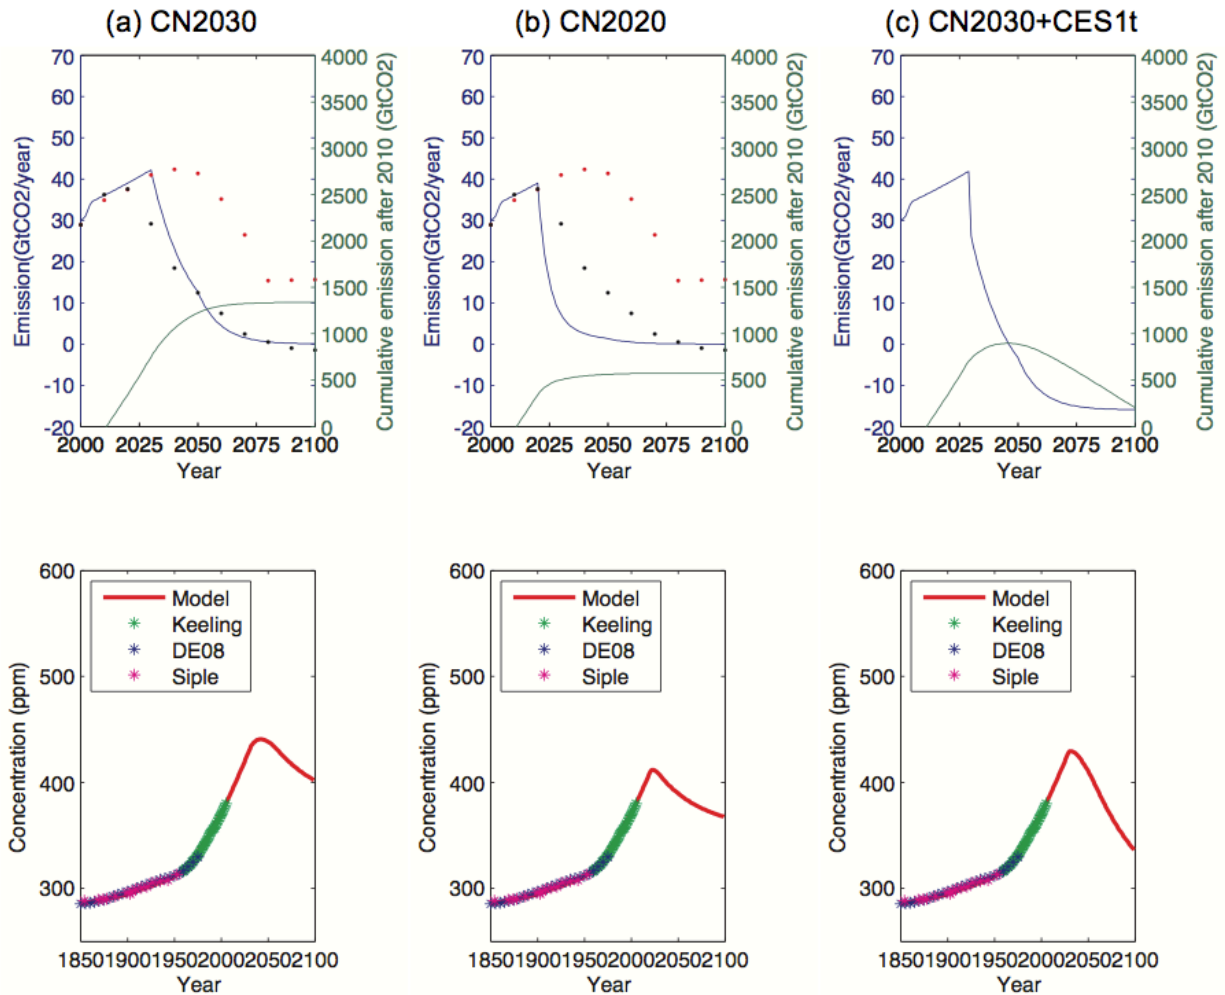

189

190

191 Fig. S2. (a) CO<sub>2</sub> emission rate (blue curve in the upper panel, Gt CO<sub>2</sub>/year), CO<sub>2</sub> cumulative  
 192 emissions since 2010 (green curve in the upper panel, Gt CO<sub>2</sub>) and CO<sub>2</sub> atmospheric concentration  
 193 (red curve in the lower panel, ppm) under the CN2030 scenario (CO<sub>2</sub> mitigation starting from  
 194 2030, which follows the INDCs before 2030 and then a post-2030 decarbonization pathway). CN  
 195 is eventually reached at about 2060-2070. CO<sub>2</sub> emission in RCP4.5 (red dots) and RCP2.6 (black  
 196 dots) are shown for references. Simulated historical CO<sub>2</sub> concentration is consistent with various  
 197 observational records since the 1850s (color dots in the lower panel). (b) Same as (a), except that  
 198 the CO<sub>2</sub> mitigation starts earlier at 2020 (CN2020). CN is reached at about 2040-2050. (c) Same  
 199 as (a) with CO<sub>2</sub> mitigation starting at 2030, but also including an additional carbon extraction and  
 200 sequestration (CES) at a rate of 16 Gt CO<sub>2</sub>/year after 2030.

201

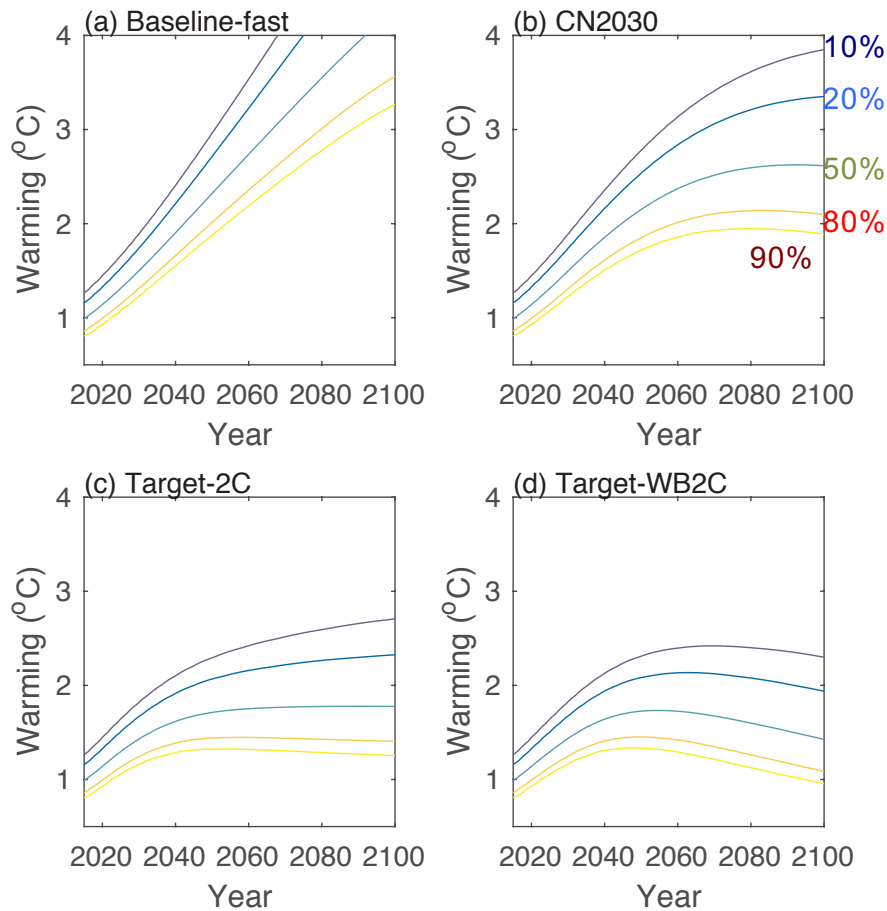

202

203

204 Fig. S3. The probability of exceeding a certain temperature threshold (Y-axis) at a given year (X-  
 205 axis) under different scenarios. (a) Baseline-fast. (b) CO<sub>2</sub> mitigation only (CN2030). (c) CO<sub>2</sub>  
 206 mitigation + SLCP mitigation (CN2030+SLCP2020, Target-2C). (d) CO<sub>2</sub> mitigation + SLCP  
 207 mitigation + CES at a rate of 16 Gt CO<sub>2</sub>/year (CN2030+SLCP2020+CES1t, Target-WB2C).

208

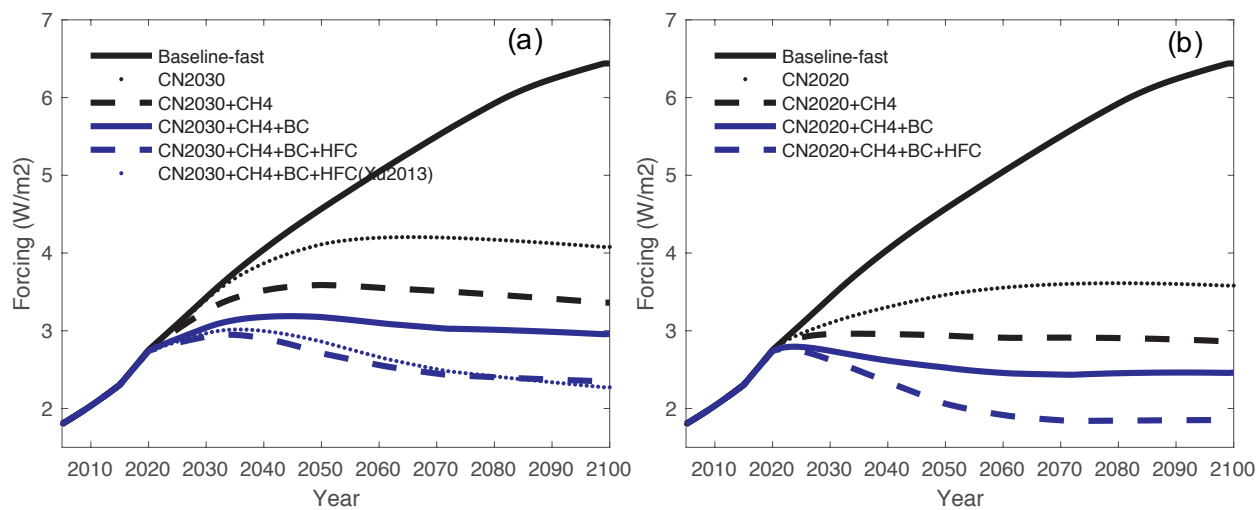

210

211

212 Fig. S4. (a) 21<sup>st</sup> century radiative forcing due to a combination of CO<sub>2</sub> and SLCP mitigation  
 213 (Target-2C: CN2030+SLCP2020). Note: the blue dots represent the HFC scenario used in a  
 214 previous study (30). (b) Same as (a) but for Target-1.5C (CN2020+SLCP2020).

215

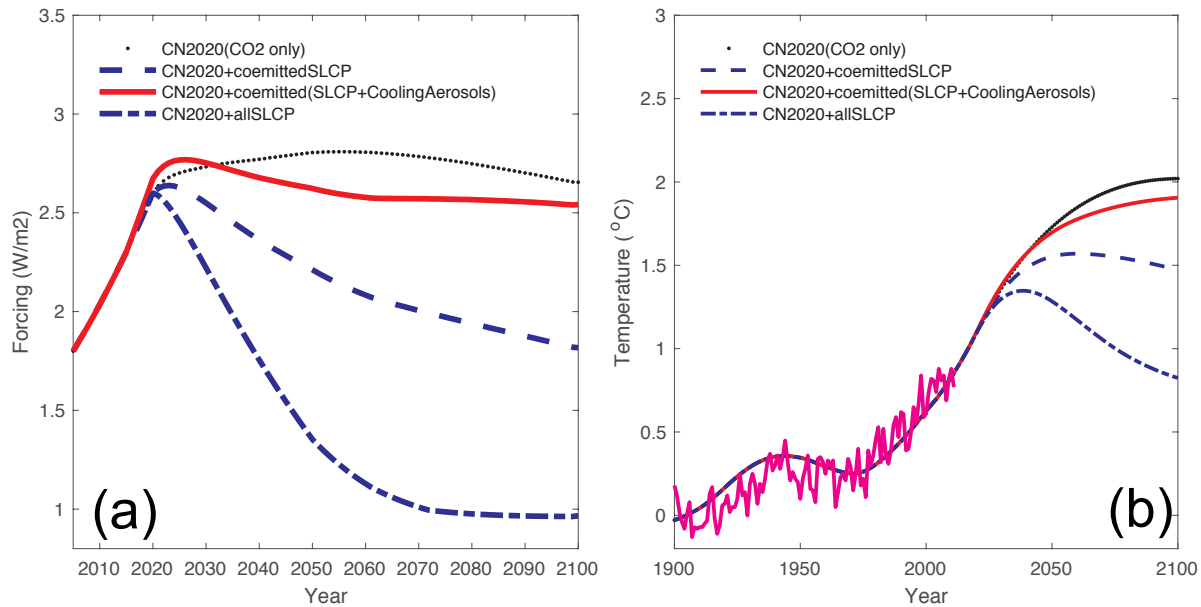

216

217

218 Fig. S5. The role of co-emitted SLCPs and cooling aerosols with CO<sub>2</sub> in the CN2020 measures.  
 219 (a) Black line is the radiative forcing due to CO<sub>2</sub> mitigation only resulting from the CN2020  
 220 measures (note that the SO<sub>4</sub> and nitrate cooling is fixed in this case, so it is not directly comparable  
 221 with the CN2020 curves in Fig. S4b), and the blue dashed line down below shows the mitigation  
 222 of CH<sub>4</sub> and BC emissions co-emitted with CO<sub>2</sub> sources, which lowers the radiative forcing by 0.8  
 223  $W/m^2$  at 2100. The dashed-dotted line includes the mitigation of all SLCPs by dedicated SLCPs  
 224 measures. By comparing the difference between three lines, we can estimate the fraction of the  
 225 SLCPs mitigation that can be accomplished by the CO<sub>2</sub>-dedicated measures, and the fraction that  
 226 can only be accomplished by the SLCPs-dedicated measures. The red line includes the mitigation  
 227 of co-emitted sulfate and nitrate aerosols, in addition to the co-emitted SLCPs with CO<sub>2</sub>, which  
 228 tends to warm the atmosphere. (b) Same as (a), but for the temperature projection under various  
 229 scenarios.

230

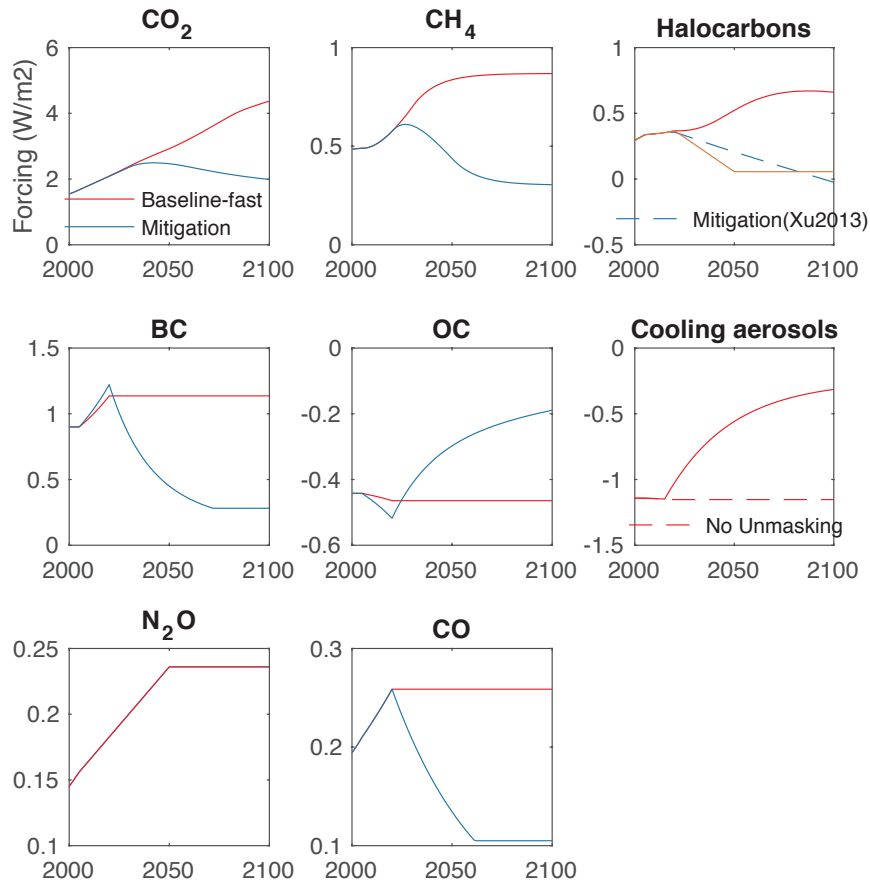

231

232

233 Fig. S6. Radiative forcing (W/m<sup>2</sup>) due to individual atmospheric compositions under the baseline  
 234 (red) and mitigation (blue) scenarios. The CO<sub>2</sub> baseline here is the Baseline-fast scenario and the  
 235 mitigation scenario here refers to CN2030. The “cooling aerosols” panel shows the cooling aerosol  
 236 forcing (due to sulfates, nitrates, and indirect effects through clouds) under baseline scenario  
 237 (reduction in red solid line) and “No Unmasking” scenario (flat red dashed line). The upper right  
 238 panel also shows the halocarbon scenario used in our previous study<sup>30</sup>.

239

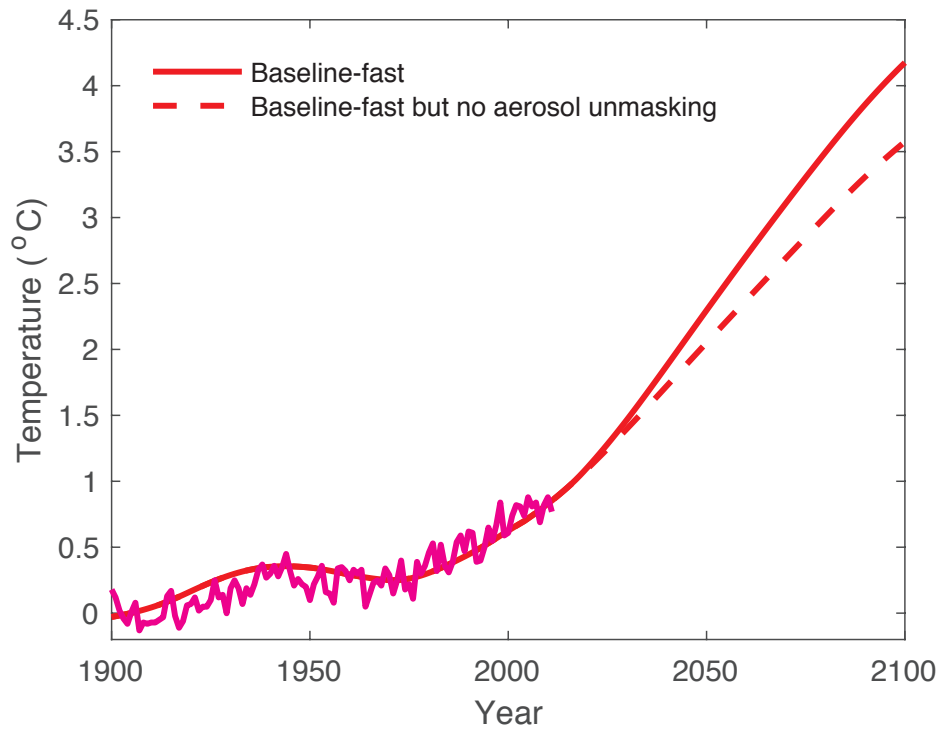

240

241

242 Fig. S7. The warming under Baseline-fast scenario (red solid line) is the same as in Fig. 3. The red  
 243 dashed line also shows the warming under Baseline-fast scenarios but without unmasking of  
 244 cooling aerosols, Fig. S6). The additional warming due to the unmasking of cooling aerosols (as  
 245 the difference between red solid and red dashed lines) is 0.25°C at 2050 and 0.6°C at 2100.

246

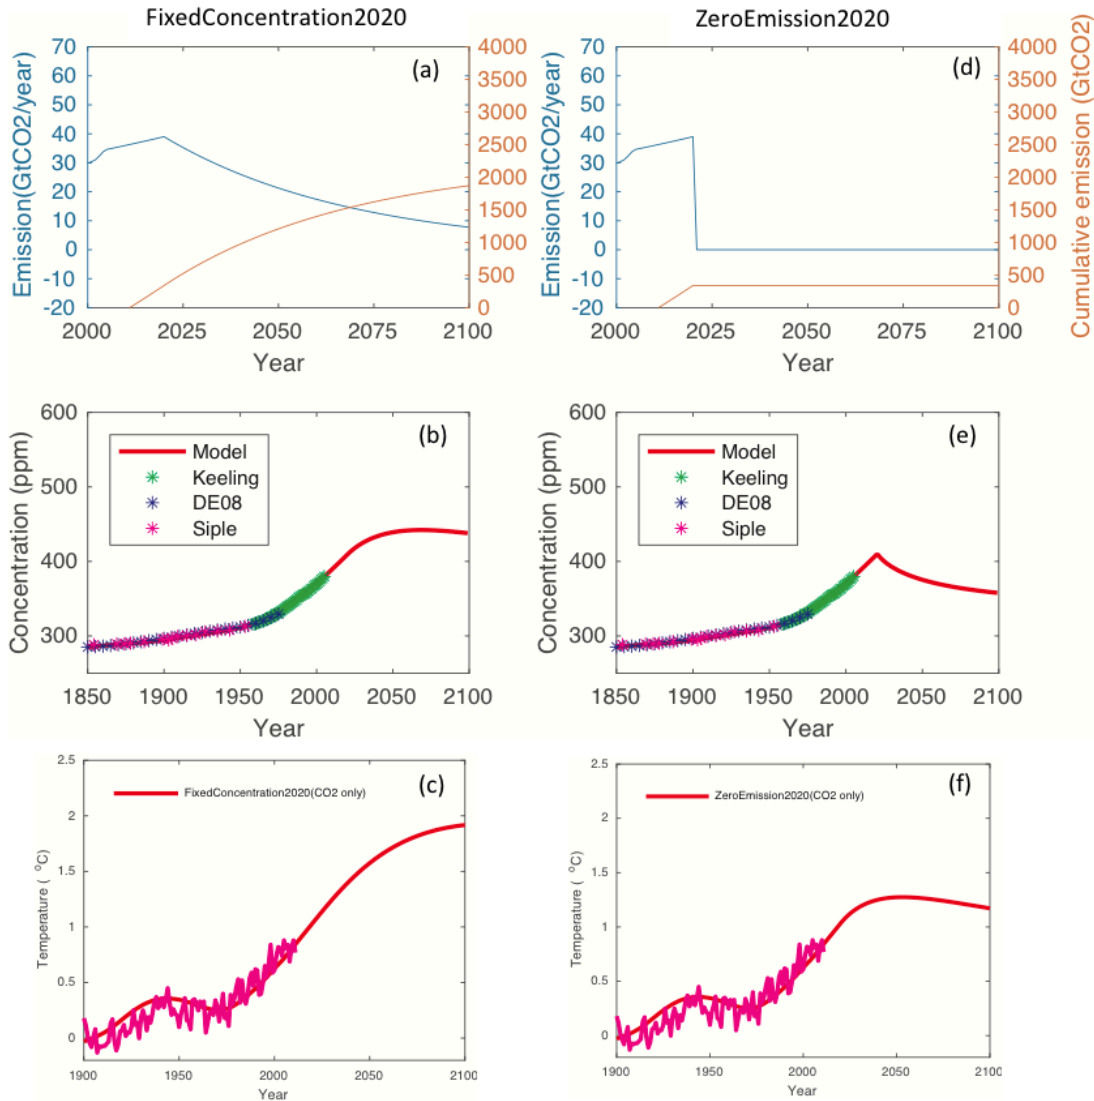

247

248

249 Fig. S8. (a) A “Fixed Concentration” scenario for CO<sub>2</sub> that is similar to Fig. S2b (CN2020), except  
 250 that the decarbonization pathway is slower and the carbon neutralization (CN) is not reached until  
 251 the end of the century. (b) Due to the slower pathway to reach CN, the CO<sub>2</sub> concentration levels  
 252 off at 2020-2030 values (“Fixed Concentration”) instead of declining as in Fig. S2b (CN2020). (c)  
 253 The temperature simulated under FixedCocentration2020 (due to CO<sub>2</sub> forcing only, with SLCP  
 254 and cooling aerosol forcing fixed at present-day level) is shown in red. (d), (e), (f): Similar to (a),  
 255 (b), (c), except under a scenario in which the CO<sub>2</sub> emission becomes to net zero after 2020  
 256 (“ZeroEmission2020”). Because of the thermal inertia of the oceans, there is an unrealized  
 257 warming of about 0.6°C due to cumulative emissions as of 2030. If the emissions of CO<sub>2</sub> were



258 reduced to zero immediately (d), CO<sub>2</sub> concentrations would decrease (e). Focusing just on CO<sub>2</sub>,  
259 the resulting decrease in radiative forcing can either offset or exceed the heat stored in the oceans  
260 such that the CO<sub>2</sub> warming can stabilize at 2030 levels or even decrease slightly (f).

261

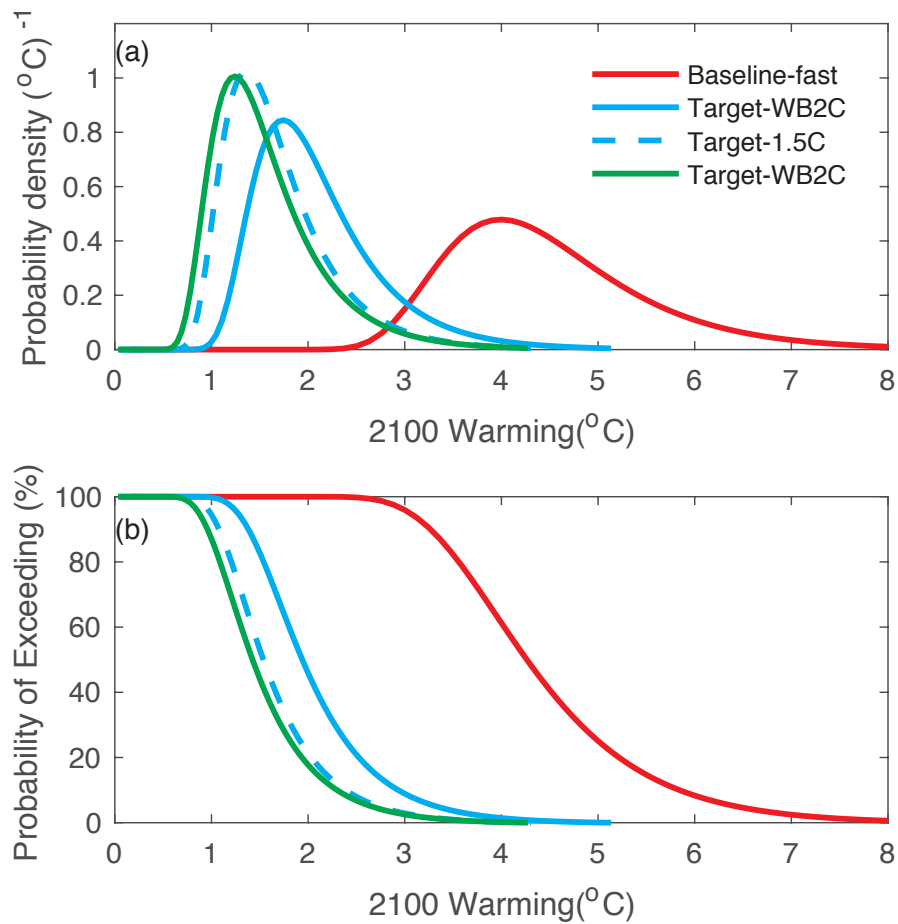

262  
 263  
 264  
 265  
 266  
 267  
 268

Fig. S9. (a) Similar to Fig. 2, but also showing two additional scenarios: CN2030+SCLP2020 (Target-2C) in blue solid line and CN2020+SLCP2020 (Target-1.5C) in blue dashed line. (b) The probability of exceeding a certain temperature threshold (X-axis) in 2100, calculated as 1- the cumulative distribution function of the curves in (a).

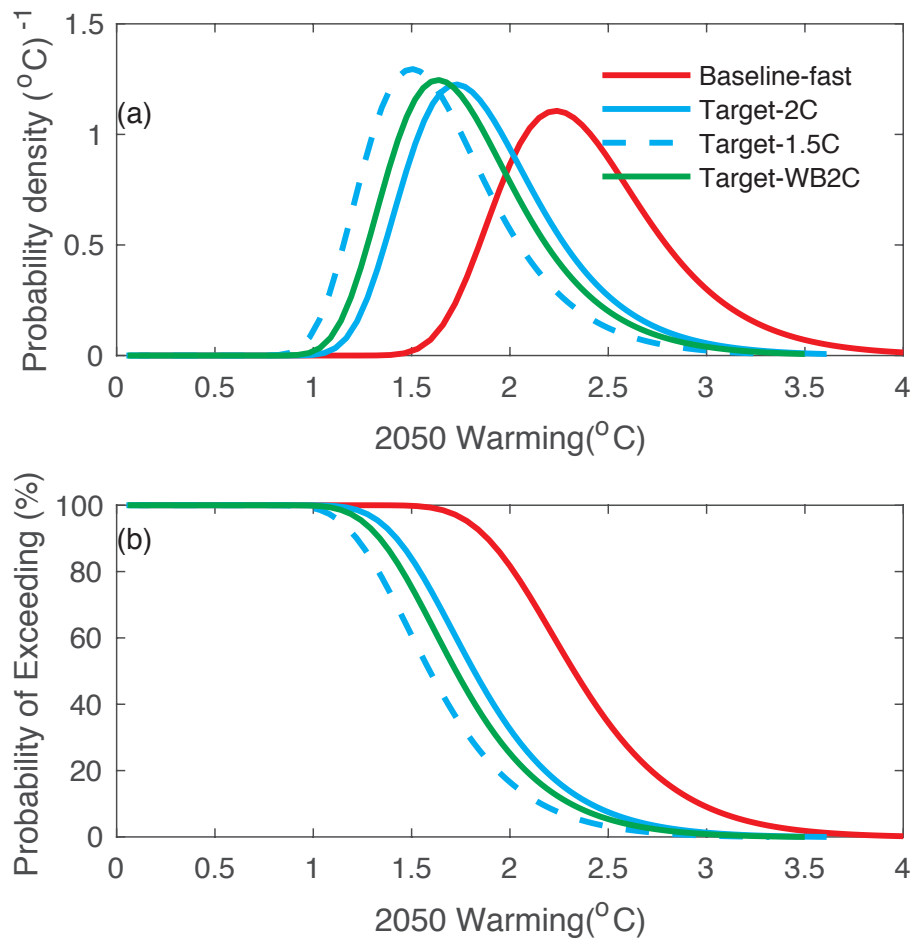

269  
 270  
 271  
 272

Fig. S10. Same as Fig. S9, but for 2050.



- 
- 1 Joos F, et al. (1996) An efficient and accurate representation of complex oceanic and biospheric models of anthropogenic carbon uptake. *Tellus, Ser B Chem Phys Meteorol* 48(3):397–417. Available at: <http://dx.doi.org/10.1034/j.1600-0889.1996.t01-2-00006.x>.
  - 2 Held IM, et al. (2010) Probing the fast and slow components of global warming by returning abruptly to preindustrial forcing. *J Clim* 23(9):2418–2427. Available at: <http://dx.doi.org/10.1175/2009JCLI3466.1>.
  - 3 Roe GH, Baker MB (2007) Why Is Climate Sensitivity So Unpredictable? *Science* (80-) 318(5850):629–632. Available at: <http://www.sciencemag.org/content/318/5850/629>.
  - 4 Cofala J, Amann M, Klimont Z, Kupiainen K, Höglund-Isaksson L (2007) Scenarios of global anthropogenic emissions of air pollutants and methane until 2030. *Atmos Environ* 41(38):8486–8499.
  - 5 Royal Society (2008) Ground-level ozone in the 21st century: Future trends, impacts and policy implications. <http://royalsociety.org/displaypagedoc.asp?id=31506>.
  - 6 Rogelj J, et al. (2014) Air pollution emission ranges consistent with the representative concentration pathways. *Nat Clim Chang* 4(May):1–5. Available at: <http://www.nature.com/doi/10.1038/nclimate2178>.
  - 7 [http://www.unep.org/ozonaction/Portals/105/documents/7809-e-Factsheet\\_Kigali\\_Amendment\\_to\\_MP.pdf](http://www.unep.org/ozonaction/Portals/105/documents/7809-e-Factsheet_Kigali_Amendment_to_MP.pdf)
  - 8 Velders GJM, Fahey DW, Daniel JS, Andersen SO, McFarland M (2015) Future atmospheric abundances and climate forcings from scenarios of global and regional hydrofluorocarbon (HFC) emissions. *Atmos Environ* 123:200–209. Available at: <http://www.sciencedirect.com/science/article/pii/S135223101530488X>.

- 
- 9 Bond TC, et al. (2013) Bounding the role of black carbon in the climate system: A scientific assessment. *J Geophys Res Atmos* 118(11):5380–5552.
- 10 Wallack J, Ramanathan V (2009) The Other Climate Changes, Why Black Carbon Also Matters, *Foreign Affairs*, Sept/Oct 2009, pp. 105-113.
- 11 Molina M, et al. (2009) Reducing abrupt climate change risk using the Montreal Protocol and other regulatory actions to complement cuts in CO<sub>2</sub> emissions. *Proc Natl Acad Sci U S A* 106(49):20616–20621.
- 12 Lim SS, et al. (2012) A comparative risk assessment of burden of disease and injury attributable to 67 risk factors and risk factor clusters in 21 regions, 1990-2010: A systematic analysis for the Global Burden of Disease Study 2010. *Lancet* 380(9859):2224–2260. Available at: [http://dx.doi.org/10.1016/S0140-6736\(12\)61766-8](http://dx.doi.org/10.1016/S0140-6736(12)61766-8).
- 13 CARB. (2015) Short-Lived Climate Pollutant Reduction Strategy. <http://www.arb.ca.gov/cc/shortlived/2015draft.pdf>
- 14 Brasseur GP, Roeckner E (2005) Impact of improved air quality on the future evolution of climate. *Geophys Res Lett* 32(23): L23704. Available at: <http://dx.doi.org/10.1029/2005GL023902>.
- 15 Xu Y, Lamarque JF, Sanderson BM (2015) The importance of aerosol scenarios in projections of future heat extremes. *Clim Change*:1–14. Available at: <http://dx.doi.org/10.1007/s10584-015-1565-1>.
- 16 NRC (2015). Climate Intervention: Carbon Dioxide Removal and Reliable Sequestration. <http://www.nap.edu/catalog/18805/climate-intervention-carbon-dioxide-removal-and-reliable-sequestration>

- 
- 17 Ragauskas AJ, et al. (2006) The Path Forward for Biofuels and Biomaterials. *Science* (80-) 311(5760):484–489. Available at: <http://science.sciencemag.org/content/311/5760/484.abstract>.
- 18 Scott V, Gilfillan S, Markusson N, Chalmers H, Haszeldine RS (2012) Last chance for carbon capture and storage. *Nat Clim Chang* 3(2):105–111. Available at: <http://dx.doi.org/10.1038/nclimate1695>.
- 19 Flato G, et al. (2013): Evaluation of Climate Models. In: *Climate Change 2013: The Physical Science Basis. Contribution of Working Group I to the Fifth Assessment Report of the Intergovernmental Panel on Climate Change* [Stocker, T.F., D. Qin, G.-K. Plattner, M. Tignor, S.K. Allen, J. Boschung, A. Nauels, Y. Xia, V. Bex and P.M. Midgley (eds.)]. Cambridge University Press, Cambridge, United Kingdom and New York, NY, USA.
- 20 Skeie RB, Berntsen T, Aldrin M, Holden M, Myhre G (2014) A lower and more constrained estimate of climate sensitivity using updated observations and detailed radiative forcing time series. *Earth Syst Dyn*:139–175.
- 21 Stott P, et al. (2013) The upper end of climate model temperature projections is inconsistent with past warming. *Environ Res Lett* 8(1):14024. Available at: <http://stacks.iop.org/1748-9326/8/i=1/a=014024>.
- 22 Richardson M, Cowtan K, Hawkins E, Stolpe MB (2016) Reconciled climate response estimates from climate models and the energy budget of Earth. *Nat Clim Chang* (June):1–6.
- 23 Myhre G (2013) Anthropogenic and Natural Radiative Forcing. In: *Climate Change 2013: The Physical Science Basis. Contribution of Working Group I to the Fifth Assessment Report of the Intergovernmental Panel on Climate Change* [Stocker, T.F., D. Qin, G.-K. Plattner, M. Tignor, S.K. Allen, J. Boschung, A. Nauels, Y. Xia, V. Bex and P.M. Midgley (eds.)]. Cambridge University Press, Cambridge, United Kingdom and New York, NY, USA.

- 
- 24 Meinshausen M, et al. (2009) Greenhouse-gas emission targets for limiting global warming to 2°C. *Nature* 458(7242):1158–1162. Available at: <http://dx.doi.org/10.1038/nature08017>.
- 25 Stocker TF, et al. (2013) Technical Summary. In: *Climate Change 2013: The Physical Science Basis. Contribution of Working Group I to the Fifth Assessment Report of the Intergovernmental Panel on Climate Change* [Stocker, T.F., D. Qin, G.-K. Plattner, M. Tignor, S.K. Allen, J. Boschung, A. Nauels, Y. Xia, V. Bex and P.M. Midgley (eds.)]. Cambridge University Press, Cambridge, United Kingdom and New York, NY, USA
- 26 Tan I, Storelvmo T, Zelinka MD (2016) Observational constraints on mixed-phase clouds imply higher climate sensitivity, *Science*, 352, 6282, 224-227, doi: 10.1126/science.aad5300
- 27 Pistone K, Eisenman I, Ramanathan V (2014) Observational determination of albedo decrease caused by vanishing Arctic sea ice. *Proc Natl Acad Sci* 111(9):3322–3326. Available at: <http://www.pnas.org/lookup/doi/10.1073/pnas.1318201111>.
- 28 Bender FA-M, Ramanathan V, Tselioudis G (2012) Changes in extratropical storm track cloudiness 1983--2008: observational support for a poleward shift. *Clim Dyn* 38(9):2037–2053. Available at: <http://dx.doi.org/10.1007/s00382-011-1065-6>.
- 29 Clarke L, et al. (2014) Assessing Transformation Pathways. In: *Climate Change 2014: Mitigation of Climate Change. Contribution of Working Group III to the Fifth Assessment Report of the Intergovernmental Panel on Climate Change* [Edenhofer, O., R. Pichs-Madruga, Y. Sokona, E. Farahani, S. Kadner, K. Seyboth, A. Adler, I. Baum, S. Brunner, P. Eickemeier, B. Kriemann, J. Savolainen, S. Schlömer, C. von Stechow, T. Zwickel and J.C. Minx (eds.)]. Cambridge University Press, Cambridge, United Kingdom and New York, NY, USA.
- 30 Xu Y, Zaelke D, Velders GJM, Ramanathan V (2013) The role of HFCs in mitigating 21st century climate change. *Atmos Chem Phys* 13(12):6083–6089.
